# Supplementary material
Source: publisher site journal article supplement (http://www.degruyter.com/publication/journal_key/GEO/downloadAsset/GEO_CFP%20Geoinformatics%202021.pdf)
Supplement: Supplementary file 1 [file GEO_CFP%20Geoinformatics%202021.pdf]

## Call for papers – Special Issue GEOINFORMATICS FOR RESILIENCE

### GUEST EDITOR

---

Prof. Shixiong Shawn Hu

### DESCRIPTION

---

The 28th International Conference on Geoinformatics (Geoinformatics 2021 - CPGIS Annual Conference) – GISciences for a Resilient Society will be held on August 8-10, 2021 in Nanchang, Jiangxi Province, China. This international conference will provide a unique forum for exchanging novel ideas and cutting-edge knowledge on geographic information sciences and technologies among GIScience professionals worldwide.

The COVID-19 pandemic has reshaped our society. Recent natural disasters also have brought tremendous disturbance to all creatures. Those catastrophic episodes cast unprecedented challenges to human societies around the globe. Harnessing spatial data and information in both physical and social dimensions, GISciences play an important role in recording, remediating, and recovering of our society from the pandemic and other disasters.

This special issue aims to address the challenges and make efforts for a resilient and sustainable world in both physical and social dimensions using GISciences. In this special issue, we invite front-line researchers and authors to submit original research and review articles focused on geoinformatics, to better understand the advances & challenges related to post-pandemic society resilience and sustainable development.

All participants presenting original researches or reviews are welcome to publish their works in the Special Issue of *Open Geosciences*.

### HOW TO SUBMIT

---

All manuscripts (research and review papers) should be submitted online at <https://www.editorialmanager.com/opengeo/>. The submitted manuscripts should meet the requirements provided in [Instruction for Authors](#). Authors are encouraged to use the Open Geosciences [Manuscript Template](#).

The online paper processing system provides a track dedicated to this Special Issue – please make sure that the option “Geoinformatics” is selected when you submit your manuscript. *Open Geosciences* ensures that all submitted papers will be considered by the editor and will go through a peer-review process as any other paper. Accepted articles will be indexed, abstracted and published.

The deadline for submission is September 30, 2021. Once a paper is accepted for publication, authors will be asked to cover Article Processing Charges.

In case of questions or further detailed information please contact Managing Editor – Dr. Jan Barabach ([jan.barabach@degruyter.com](mailto:jan.barabach@degruyter.com)).

- Authors publishing in *Open Geosciences* enjoy the following benefits:
- IMPACT FACTOR (2020) – 1.229
- no submission charges
- fast, comprehensive and transparent peer-review
- free language assistance for authors from non-English speaking regions
- immediate publication upon completing the publishing process
- comprehensive abstracting and indexing – JCR and SCIE, SCOPUS
- extensive promotion and worldwide distribution of each published article

[degruyter.com/geo](https://degruyter.com/geo)
